# Supplementary material
Source: PubMed Central journal article supplement (PMC6187617)
Supplement: supp_RA118.004134_138370_2_supp_189228_pdv5s7.pdf [file supp_RA118.004134_138370_2_supp_189228_pdv5s7.pdf]

### Supporting information

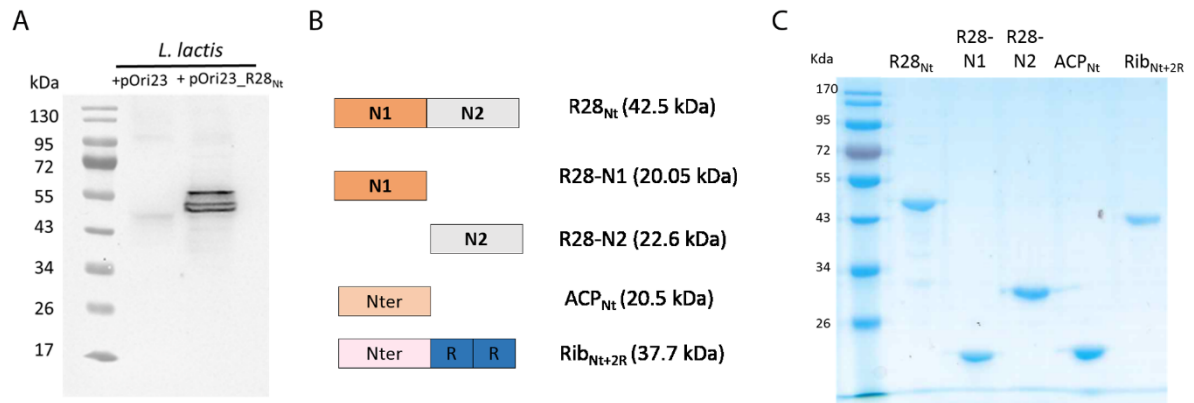

**Figure S1. Schematic representation of constructed peptides used in this study, and their expression in *L. lactis* or *E. coli*.** *A*, Western blot with anti-R28<sub>Nt</sub> antiserum of cell wall extracts of *L. lactis* expressing R28<sub>Nt</sub>, + pOri\_R28<sub>Nt</sub>; or not, +pOri. *B*, schematic representation of the different peptides used in the study. Color code corresponds to Fig. 1*A*. *C*, Coomassie blue staining of an acrylamide gel with 1 µg of each peptide loaded.

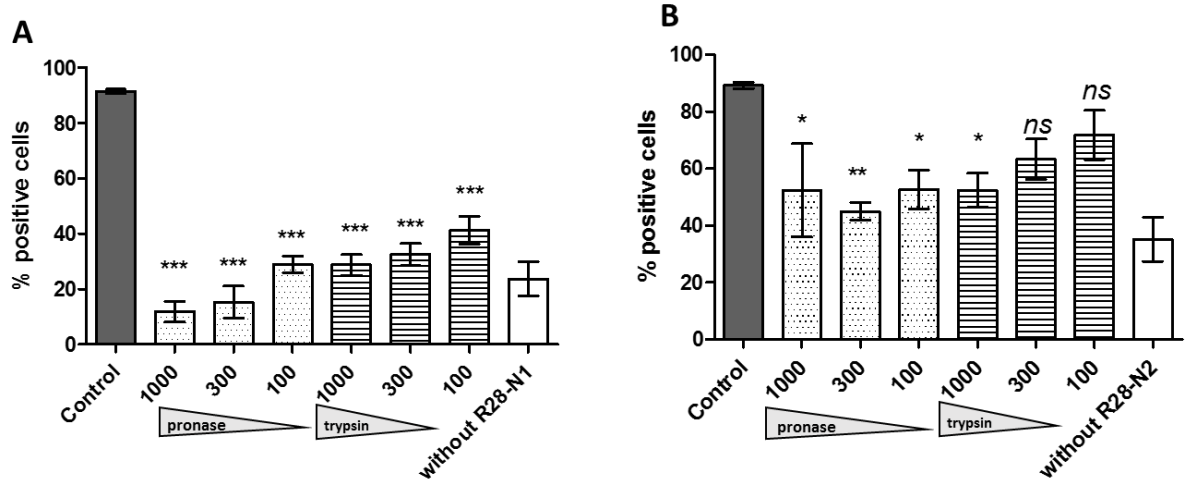

**Figure S2. Effect of different treatments on the binding of A, R28-N1 and B, R28-N2 to HEC-1-A cells.** Treatments were applied to HEC-1-A cells in suspension prior to incubation with purified R28-N1 and R28-N2; bound peptides were immunolabelled and cells were analyzed by flow cytometry. Statistical analysis was performed against the untreated condition Error bars correspond to SEM of three independent experiments. Two-Way ANOVA: \*,  $p < 0.05$ ; \*\*,  $p < 0.005$ ; \*\*\*,  $p < 0.001$ ; ns, not significant.

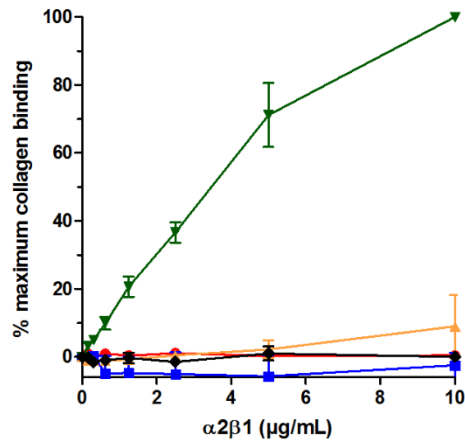

**Figure S3. R28Nt, R28-N1 and R28-N2 do not bind the  $\alpha 2\beta 1$  integrin.** Assessment of integrin  $\alpha 2\beta 1$  binding to R28<sub>Nt</sub>, red; R28-N1, blue; R28-N2, orange; Type I collagen, green; BSA, black. The binding is expressed as percentage of that of the collagen at 10  $\mu\text{g/mL}$  integrin.

**Table S1.** Strains and plasmids used in this study

| Strains or plasmid                     | Relevant properties                                                                                                                                   | Source or reference     |
|----------------------------------------|-------------------------------------------------------------------------------------------------------------------------------------------------------|-------------------------|
| <u><i>Escherichia coli</i></u>         |                                                                                                                                                       |                         |
| BL21 λDE3                              | F <sup>-</sup> <i>ompT gal (dcm) (lon) hsdSB (rB<sup>-</sup> mB<sup>-</sup>) endA1 hsdR17(rK<sup>-</sup>mK<sup>+</sup>)</i>                           | (1)                     |
| <u><i>Streptococcus pyogenes</i></u>   |                                                                                                                                                       |                         |
| M28PF1                                 | <i>emm28</i> source of DNA for R28 <sub>Nt</sub> , R28-N1, R28-N2 amplifications                                                                      | (2)                     |
| ΔR28                                   | M28PF1 lacking the <i>Spy1336</i> coding for R28                                                                                                      | This study              |
| <u><i>Streptococcus agalactiae</i></u> |                                                                                                                                                       |                         |
| A909                                   | serotype Ia, sequence type 7 , used for amplification of the gene of ACP                                                                              | (3)                     |
| BM110                                  | serotype III, sequence type 17, used for the amplification of the gene encoding Rib                                                                   | (4)                     |
| <u><i>Lactococcus lactis</i></u>       |                                                                                                                                                       |                         |
| MG1363                                 | Lac <sup>-</sup> Prt <sup>-</sup> ; NCDO 712 derivative                                                                                               | (5)                     |
| CCH2022                                | MG1363+ pOri23                                                                                                                                        | This study              |
| CCH2023                                | MG1363+ pOri23_R28 <sub>Nt</sub>                                                                                                                      | This study              |
| <u>Plasmids</u>                        |                                                                                                                                                       |                         |
| pG+host5                               | Erm; ColE1 replicon, thermosensitive derivative of pGK12; MCS pBluescript                                                                             | (6)                     |
| pG1_R28                                | 500 pb upstream (R28F1-R28R1) and 500 bp downstream (R28F2-R28R2) sequence of <i>Spy1336</i> cloned in pG+host5                                       | This study              |
| pET2818                                | Amp, oriR pBR322, T7 promoter, His-Tag coding sequence, pET28/16 derivative.                                                                          | S. Mesnage (Pers. com.) |
| pET2818_R28 <sub>Nt</sub>              | pET2818 with the sequence encoding the R28 <sub>Nt</sub> , without signal peptide. For the production of the peptide in <i>E. coli</i> with a His Tag | This study              |
| pET2818_R28.N1                         | Ibidem with the sequence encoding R28-N1                                                                                                              | This study              |
| pET2818_R28.N2                         | Ibidem with the sequence encoding R28-N2                                                                                                              | This study              |
| pET2818_ACP                            | Ibidem with the sequence encoding ACP                                                                                                                 | This study              |
| pOri23                                 | Erm; <i>ermB</i> , ori ColE1, thermosensitive derivative of pIL253, P23 promoter of <i>L. lactis</i> MG1363                                           | (7)                     |
| pOri23_R28 <sub>Nt</sub>               | High level of expression of R28 <sub>Nt</sub> at the cell wall of Gram-positive bacteria                                                              | This study              |

**Table S2.** Primers used in this study for cloning and protein purifications

| Primer Name | Sequence*                                     |
|-------------|-----------------------------------------------|
| R28-F1      | CGACTCTAGAG <b>GATCC</b> GCCTGTGAGAGACGATCATA |
| R28-R1      | ATCATTCTTATCGGCCCGTTGTTTCGTCTGTGAAG           |
| R28-F2      | GCCGATAAGAATGATCCAGC                          |
| R28-R2      | CCATGATTAC <b>GAATTC</b> GCCTTAACTCGTATTCCTTT |
| R28_F       | <b>CCATGG</b> GCTACAATTCCAGGGAGTGC            |
| R28_R       | <b>GGATCC</b> ACCTTTTGGTTCGTTCGTATC           |
| R28_N1_F    | <b>CCATGG</b> GGTCTACAATTCC                   |
| R28_N1_R    | <b>GGATC</b> CTGGTAGCGATAACAATAA              |
| R28_N2_F    | <b>CCATGG</b> ATAAAATTAAGTATTCGCC             |
| R28_N2_R    | <b>GGATC</b> CTTTTGGTTCGTTG                   |
| ACP_F       | <b>CCATGG</b> GGTCAATAGTTGCTGCATCTACAAT       |
| ACP_R       | <b>GGATC</b> CTACTGACAATACTAACAATTTCTC        |

\* restriction enzyme sites used for cloning are highlighted in bold

**Supporting information references:**

1. Studier, F. W., and Moffatt, B. A. (1986) Use of Bacteriophage T7 RNA Polymerase to Direct Selective High-level Expression of Cloned Genes. *J. Mol. Biol.* **189**, 113–130
2. Longo, M., De Jode, M., Plainvert, C., Weckel, A., Hua, A., Château, A., Glaser, P., Poyart, C., and Fouet, A. (2015) Complete Genome Sequence of *Streptococcus pyogenes* emm28 Clinical Isolate M28PF1, Responsible for a Puerperal Fever. *Genome Announc.* **3**, e00750-15
3. Michel, J. L., Madoff, L. C., Olson, K., Kling, D. E., Kasper, D. L., and Ausubel, F. M. (1992) Large, identical, tandem repeating units in the C protein alpha antigen gene, bca, of group B streptococci. *Proc. Natl. Acad. Sci. U. S. A.* **89**, 10060–10064
4. Six, A., Bellais, S., Bouaboud, A., Fouet, A., Gabriel, C., Tazi, A., Dramsi, S., Trieu-Cuot, P., and Poyart, C. (2015) Srr2, a multifaceted adhesin expressed by ST-17 hypervirulent Group B Streptococcus involved in binding to both fibrinogen and plasminogen. *Mol. Microbiol.* **97**, 1209–1222
5. Wegmann, U., O'Connell-Motherway, M., Zomer, A., Buist, G., Shearman, C., Canchaya, C., Ventura, M., Goesmann, A., Gasson, M. J., Kuipers, O. P., Van Sinderen, D., and Kok, J. (2007) Complete Genome Sequence of the Prototype Lactic Acid Bacterium *Lactococcus lactis* subsp. *cremoris* MG1363. *J. Bacteriol.* **189**, 3256–3270
6. Biswas, I., Gruss, A., Ehrlich, S. D., and Maguin, E. (1993) High-efficiency gene inactivation and replacement system for gram-positive bacteria. *J. Bacteriol.* **175**, 3628–35
7. Braun, L., Ghebrehwet, B., and Cossart, P. (2000) gC1q-R/p32, a C1q-binding protein, is a receptor for the InlB invasion protein of *Listeria monocytogenes*. *EMBO J.* **19**, 1458–1466

**Supporting information file**

The raw data of hits found by mass-spectrometry analysis of the co-immunoprecipitations are available in the supporting information file. In green and yellow are highlighted hits that are significantly enriched in the presence of R28<sub>Nt</sub> in all three independent experiments. In yellow are the surface exposed membrane proteins that correspond to Table 1 hits. In pink are highlighted the samples in which the given protein was not detected. CT-1, CT-2, CT-3 and R28-1, R28-2, R28-3, samples eluted from the control zones and R28<sub>Nt</sub> co-immunoprecipitated zones of experiments 1, 2, 3, respectively
